# Supplementary material
Source: publisher figshare collection journal article supplement (https://adisjournals.figshare.com/ndownloader/files/35736752)
Supplement: Supplementary file 1 [file 35736752]

## Delafloxacin: Adis Evaluation

### Clinical Considerations

- Anionic fluoroquinolone with a unique chemical structure; targets both DNA gyrase and topoisomerase IV
- Noninferior to moxifloxacin in a phase III trial with respect to clinical response rates
- Generally well tolerated, with a tolerability profile generally consistent with that established for patients with bacterial skin infections
- Not associated with QT prolongation or phototoxicity
- Suitable for intravenous or oral administration, with switching from intravenous to oral possible

### Plain Language Summary

#### *Background and rationale*

- Community-acquired pneumonia (CAP) can be caused by bacterial infection of the lungs, and is a common cause of infection-related deaths.
- As drug-resistant bacteria are becoming more common, new antibacterial drugs are needed.
- Delafloxacin (BAXDELA® in the USA; Quofenix® in the EU) is a fluoroquinolone antibacterial that inhibits bacterial enzymes required for DNA repair and replication.

#### *Clinical findings*

- Delafloxacin kills a wide range of bacteria, including some drug-resistant variants.
- During a trial in adults with CAP, delafloxacin was as effective as moxifloxacin (also a fluoroquinolone antibacterial).
- Delafloxacin may be more effective than moxifloxacin in patients with a history of asthma or chronic obstructive pulmonary disease (COPD), although further research is needed.
- Most adverse events with delafloxacin were mild or moderate in severity, with diarrhoea being the most commonly occurring treatment-related adverse event (experienced by < 4% of recipients).
- The adverse effects of delafloxacin were generally consistent with those previously observed in patients with skin infections.

#### *Conclusion*

Delafloxacin expands the range of treatments for CAP, and is potentially useful for patients with comorbid asthma or COPD.

This plain language summary represents the opinions of the authors. For a full list of declarations, including funding and author disclosure statements, please see the full text online. © Springer Nature Switzerland AG 2022.
